# Supplementary material
Source: PubMed Central journal article supplement (PMC2096470)

Supplementary Figure 1. The R200W mutation renders pVHL less stable. **A.** Wt and R/R ES cells were treated with cycloheximide (CHX) for the indicated lengths of time and pVHL levels were determined by Western blot (arrow indicates pVHL). R/R pVHL has a shorter half-life than the wt protein (approximately 2 hours for R/R compared to greater than 12 hours for wt). Cyclin D1 was used as a positive control for the effectiveness of CHX treatment. **B.** Western blot showing that, in contrast to an antibody directed against the C-terminus, an antibody against full-length pVHL recognizes wt and R200W pVHL equivalently. **C.** Autoradiograph of wt and R200W pVHL in vitro transcribed and translated in the presence of <sup>35</sup>S-Met revealed no difference in the translation of R/R protein compared to wt. **D.** Wt and R/R ES cells were treated with DMSO vehicle (D), or one of three proteasome inhibitors: ALLN (A), lactacystin (L), or MG132 (M). Treatment with any of these compounds increased the stability of R/R pVHL above the level seen in control DMSO-treated cells. Wt pVHL is very stable and not affected by any of these compounds. Arrow indicates pVHL. p53 was used as a positive control for the effectiveness of inhibitor treatment.

Supplementary Figure 2. VEGF and Epo levels increase with age in *Vhl<sup>R/R</sup>* mice. Serum levels of VEGF (**A.**) and Epo (**B.**) were measured by ELISA in mice of various ages. (\* p < 0.04; # approaching significance, p < 0.06; p < 0.08 for R/R Epo levels at 21-28 weeks).

Supplementary Figure 3. Enhanced angiogenesis in the skin of *Vhl<sup>R/R</sup>* mice. **A.** Representative sections of skin from wt and R/R mice stained with H&E (top, 10x magnification, scale bar represents 100µm) or with an antibody to CD31 to mark vessels (bottom, 20x magnification, scale bar represents 50µm). **B.** Quantification of the number of CD31<sup>+</sup> blood vessels revealed a slight increase in the vascularity of R/R skin compared to wt controls, which may contribute to the redness observed in R/R mice.

Supplementary Figure 4. Additional phenotypes in *Vhl<sup>R/R</sup>* mice. **A.** Representative sections of wt and R/R livers stained with H&E (top, 10x magnification, scale bar represents 100µm) or oil red O (bottom, 40x magnification, scale bar represents 20µm) revealed no changes in fat deposition in

R/R livers. However, the vascularity of R/R livers was significantly increased compared to wt controls (**B.**). (\*  $p < 0.05$ ) **C.** Representative H&E sections of wt and two independent R/R lungs revealed that the vessels in R/R mice were congested with blood (top, 5x magnification, scale bar represents 200 $\mu$ m). Staining of lung tissue with  $\alpha$ -SMA did not differ significantly between wt and R/R animals (bottom, 20x magnification, scale bar represents 50 $\mu$ m).

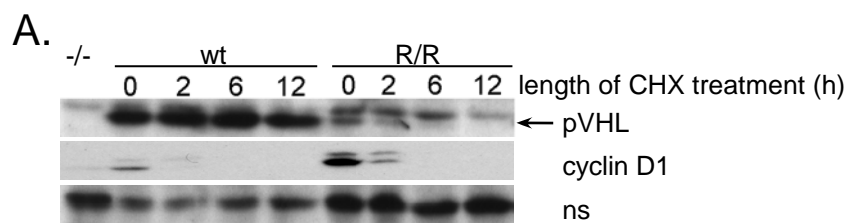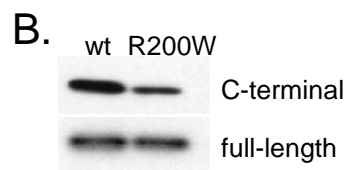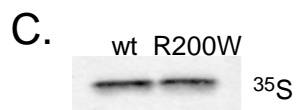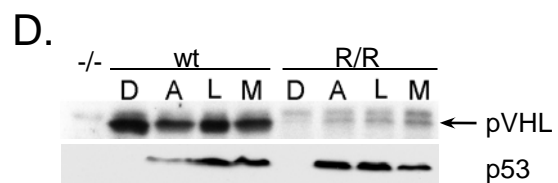

A.

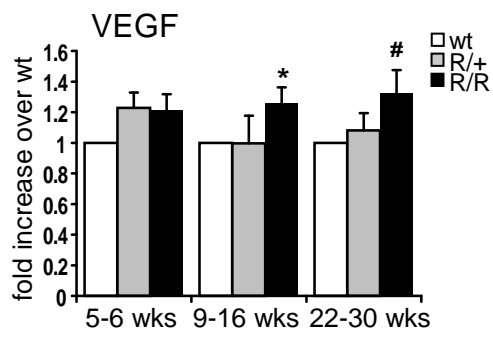

B.

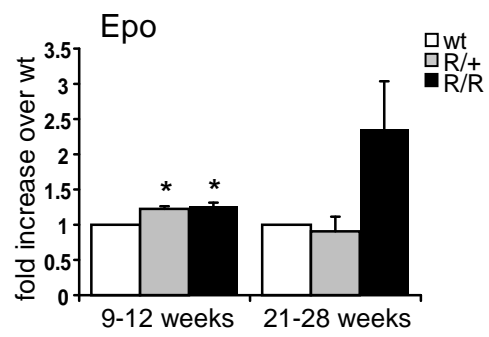

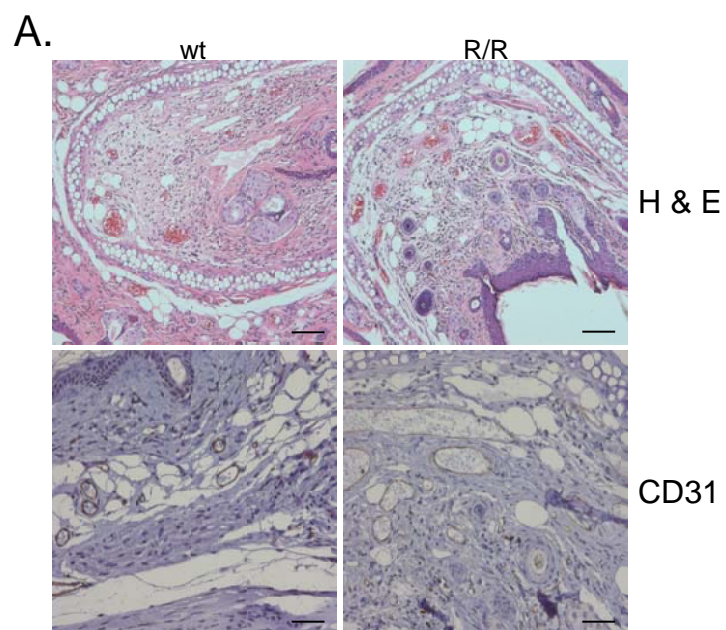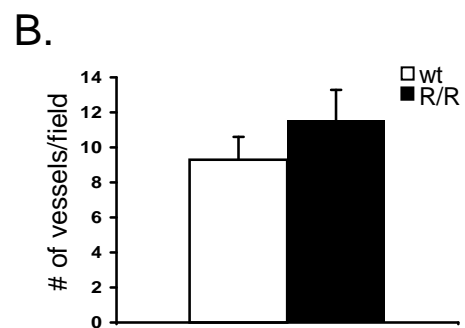

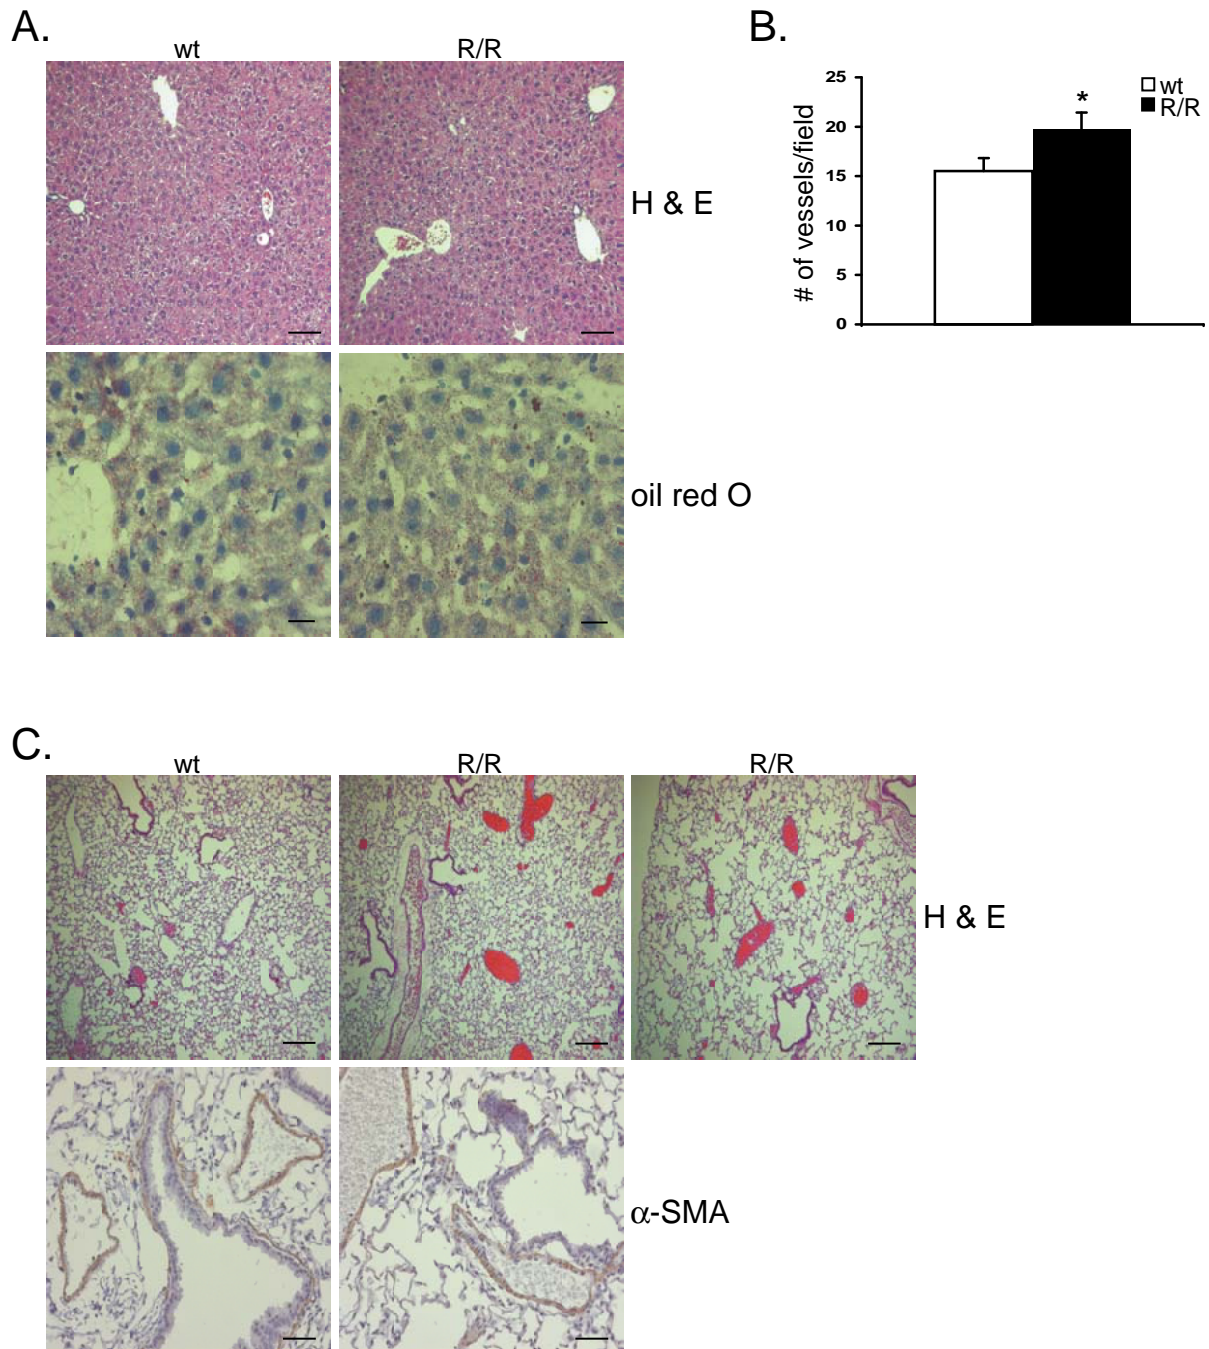

Supplement: JCI0732614sd.pdf [file JCI0732614sd.pdf]
